# Supplementary material for: Adoptive TIL Transfer in the Adjuvant Setting for Melanoma: Long-Term Patient Survival
Source: J Immunol Res. 2014 Jan 8;2014:186212. doi: 10.1155/2014/186212 (PMC3987883; doi:10.1155/2014/186212)
Supplement: Supplementary file 2 [file 186212.f2.xls]

## Sheet: Feuil1
Patients	Relapsed	Number of infused TIL x 109		% CD3/CD4-positiveb		% CD3/CD8-positiveb		Ratio CD4/CD8		% IFN-g-positive lymphocytesc
		E1a	E2	E1	E2	E1	E2	E1	E2	E1a	E2
M88*	+	6	0.7	27	39	71	59	0.4	0.7	ND	0.4
M98*	+	33.5	21.4	85	93	14	7	6.1	13.3	NA	NA
M99	-	1.7	0.8	60	33	38	61	1.57895	0.540984	NA	NA
M100	+	11.6	6	94	95	5	4	18.8	23.75	NA	NA
M103*	+	7.65	27.6	43	57	66	58	0.651515	0.982759	NA	NA
M110	-	1.13	1.05	78	84	18	18	4.33333	4.66667	0	0
M113	-	10	11.2	36	75	75	28	0.48	2.67857	10.3	0.8
M117	+	1.4	32	30	3	70	97	0.428571	0.0309278	ND	2.5
M125	-	12	13.2	71	65	30	36	2.36667	1.80556	0	2.4
M126	-	10.2	10.8	55	39	40	56	1.375	0.696429	NA	NA
M132	-	8.3	12.2	39	20	58	80	0.672414	0.25	0	0
M134	+	13.5	9	55	62	45	38	1.22222	1.63158	0.7	0
M139*	-	12.3	13.4	53	60	42	34	1.2619	1.76471	NA	NA
M148	-	15.2	3.1	39	46	57	55	0.684211	0.836364	NA	NA
M158	-	8	10.2	30	31	70	63	0.428571	0.492063	0	0
M170*	+	9	0.53	30	32	67	67	0.447761	0.477612	1.2	ND
M171	-	10	12	48	42	52	58	0.923077	0.724138	0	0
M174*	+	9.5	4.7	80	70	20	30	4	2.33333	NA	NA
M180*	+	5.5	3.5	29	19	68	80	0.426471	0.2375	NA	NA
M182	+	0.576	3.1	87	25	13	71	6.69231	0.352113	0	0.7
M187	+	8	10	16	24	86	76	0.186047	0.315789	2.9	0.35
M192	-	10	15.6	49	82	51	18	0.960784	4.55556	NA	NA
M193	-	12	5.2	14	27	86	73	0.162791	0.369863	3.5	4
M196*	-	8.6	14	40	22	58	74	0.689655	0.297297	1	0
M197*	+	14	1	48	32	52	68	0.923077	0.470588	2.9	0
M199	-	5	3.3	25	14	75	86	0.333333	0.162791	2.7	2.4
M204	-	9.5	16.5	92	88	8	17	11.5	5.17647	0	3.4
M209*	-	6.8	6.2	63	71	36	29	1.75	2.44828	NA	NA
M212	-	7.8	11	52	33	47	57	1.10638	0.578947	0.4	1
M213*	+	9.1	8.5	24	24	76	72	0.315789	0.333333	NA	NA
M215*	+	8.8	5.5	45	68	46	31	0.978261	2.19355	NA	NA
*Melanoma patients bearing only one metastatic lymph node
a E1 and E2 were TIL populations obtained and reinjected to the patient from respectively the first and the second ex-vivo expansions
bPercentages of CD-positive TIL were estimated by membrane labeling. Cells were analyzed on a FACScan.
cPercentages of IFN-g secreting TIL were estimated by intracellular labeling. TIL were stimulated 6h by autologous melanoma cells in presence of brefeldin A.
Then, cells were fixed, permeabilized, stained for cytokine production and analyzed on a FACScalibur.
dRelapse of patients [(-): patients who relapsed; (+): patients who did not relapse]
Table IV: Proportion, phenotype and fractions of tumor-reactive lymphocytes of large-scale expanded TIL from melanoma-invaded lymph nodes from 31 patients .
